# Supplementary material for: New Insights and Evidence on “Food Intolerances”: Non-Celiac Gluten Sensitivity and Nickel Allergic Contact Mucositis
Source: MDPI journal article supplement (doi:10.3390/nu15102353), 2023-05-17
Supplement: s1 [file s1]

**Supplemental Table S1:** Gastrointestinal Symptom Rating Scale (GSRS) questionnaire, modified according to the Salerno Experts' Criteria

|                            |   |   |   |   |   |   |   |   |   |   |    |
|----------------------------|---|---|---|---|---|---|---|---|---|---|----|
| ABDOMINAL PAIN             | 0 | 1 | 2 | 3 | 4 | 5 | 6 | 7 | 8 | 9 | 10 |
| RETROSTERNAL BURNER        | 0 | 1 | 2 | 3 | 4 | 5 | 6 | 7 | 8 | 9 | 10 |
| ACID REGURGITATION         | 0 | 1 | 2 | 3 | 4 | 5 | 6 | 7 | 8 | 9 | 10 |
| BLOATING                   | 0 | 1 | 2 | 3 | 4 | 5 | 6 | 7 | 8 | 9 | 10 |
| NAUSEA                     | 0 | 1 | 2 | 3 | 4 | 5 | 6 | 7 | 8 | 9 | 10 |
| VOMITING                   | 0 | 1 | 2 | 3 | 4 | 5 | 6 | 7 | 8 | 9 | 10 |
| BORBORYGMUS                | 0 | 1 | 2 | 3 | 4 | 5 | 6 | 7 | 8 | 9 | 10 |
| ABDOMINAL DISTENSION       | 0 | 1 | 2 | 3 | 4 | 5 | 6 | 7 | 8 | 9 | 10 |
| ERUCTATION                 | 0 | 1 | 2 | 3 | 4 | 5 | 6 | 7 | 8 | 9 | 10 |
| INCREASED FLATUS           | 0 | 1 | 2 | 3 | 4 | 5 | 6 | 7 | 8 | 9 | 10 |
| INCREASE OF EVACUATIONS    | 0 | 1 | 2 | 3 | 4 | 5 | 6 | 7 | 8 | 9 | 10 |
| DECREASE OF EVACUATIONS    | 0 | 1 | 2 | 3 | 4 | 5 | 6 | 7 | 8 | 9 | 10 |
| LOOSE STOOLS               | 0 | 1 | 2 | 3 | 4 | 5 | 6 | 7 | 8 | 9 | 10 |
| HARD STOOLS                | 0 | 1 | 2 | 3 | 4 | 5 | 6 | 7 | 8 | 9 | 10 |
| URGENT NEED FOR DEFECATION | 0 | 1 | 2 | 3 | 4 | 5 | 6 | 7 | 8 | 9 | 10 |
| DERMATITIS                 | 0 | 1 | 2 | 3 | 4 | 5 | 6 | 7 | 8 | 9 | 10 |
| HEADACHE                   | 0 | 1 | 2 | 3 | 4 | 5 | 6 | 7 | 8 | 9 | 10 |
| FOGGY MIND                 | 0 | 1 | 2 | 3 | 4 | 5 | 6 | 7 | 8 | 9 | 10 |
| FATIGUE                    | 0 | 1 | 2 | 3 | 4 | 5 | 6 | 7 | 8 | 9 | 10 |
| NUMBNESS OF THE LIMBS      | 0 | 1 | 2 | 3 | 4 | 5 | 6 | 7 | 8 | 9 | 10 |
| MUSCLE PAINS               | 0 | 1 | 2 | 3 | 4 | 5 | 6 | 7 | 8 | 9 | 10 |
| JOINT PAINS                | 0 | 1 | 2 | 3 | 4 | 5 | 6 | 7 | 8 | 9 | 10 |
| FAINTING                   | 0 | 1 | 2 | 3 | 4 | 5 | 6 | 7 | 8 | 9 | 10 |
| ORAL ULCERS                | 0 | 1 | 2 | 3 | 4 | 5 | 6 | 7 | 8 | 9 | 10 |
| PELVIC PAIN                | 0 | 1 | 2 | 3 | 4 | 5 | 6 | 7 | 8 | 9 | 10 |
| DISMENORREA                | 0 | 1 | 2 | 3 | 4 | 5 | 6 | 7 | 8 | 9 | 10 |
| DISPAREUNIA                | 0 | 1 | 2 | 3 | 4 | 5 | 6 | 7 | 8 | 9 | 10 |
| OTHER:                     | 0 | 1 | 2 | 3 | 4 | 5 | 6 | 7 | 8 | 9 | 10 |

NB: mark with an X the box corresponding to the intensity of the symptom (min = 0, max = 10)

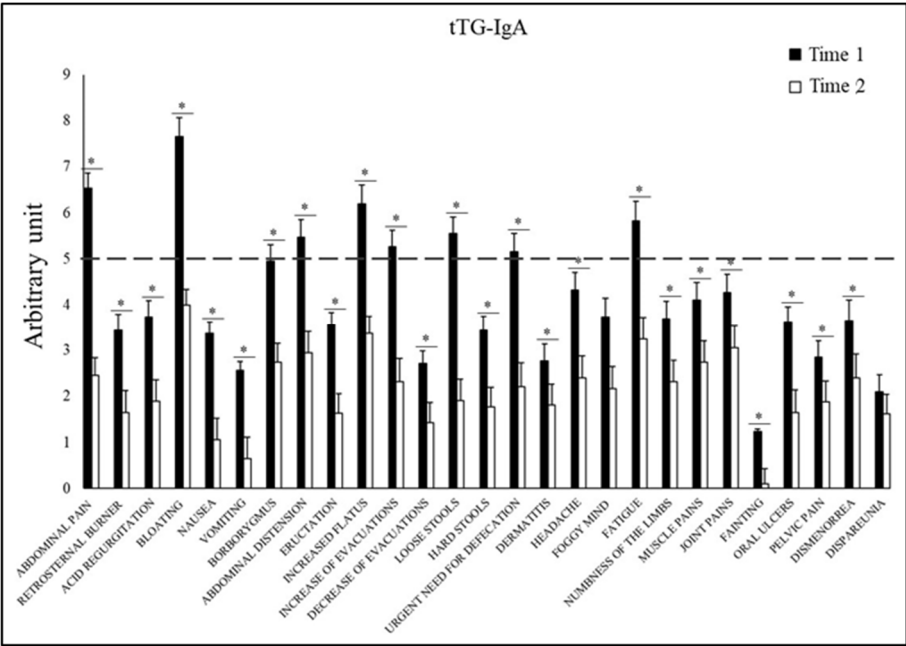

**Supplemental Figure S1.** Comparison of GSRS questionnaire results at Time 1 and Time 2 in tTG-IgA positive patients. The bar graphs represent the mean  $\pm$  SEM of the GSRS score for each symptom. The GSRS questionnaire is considered positive if at least 3 of the 27 symptoms considered have a score  $\geq 5$ . The red line indicates the cut-off point. \*  $p$ -value  $< 0.05$  for Time 2 (after their specific diet) versus Time 1 (on their regular diet) ( $T$ -Test).

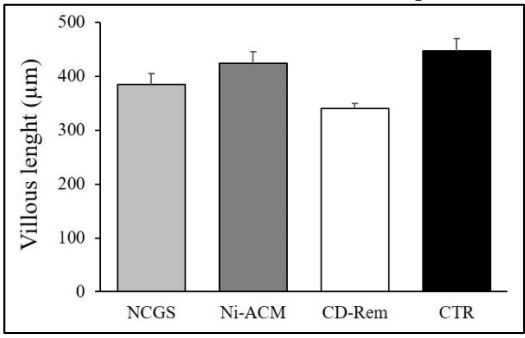

**Supplemental Figure S2.** Histomorphometric evaluation of villous lengths. The bar graphs represent the villous length in  $\mu\text{m}$ . NCGS: non-celiac gluten sensitivity; Ni-ACM: nickel allergic contact mucositis; CD-Rem: celiac disease in remission; CTR: controls.

#

#
